# Supplementary material
Source: PubMed Central journal article supplement (PMC2736005)

### Supplemental Figure S2

Frequency distributions of  $\omega$  values (Ka/Ks) of rice annotated genes (purple), all pseudogenes (green), and pseudogenes with premature stops (S) and/or frameshifts (FS) (blue).

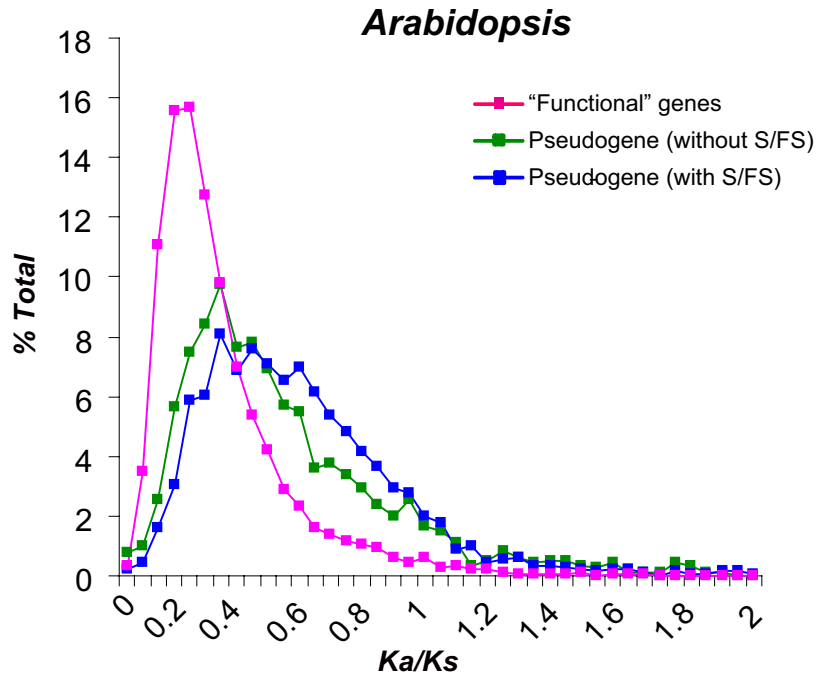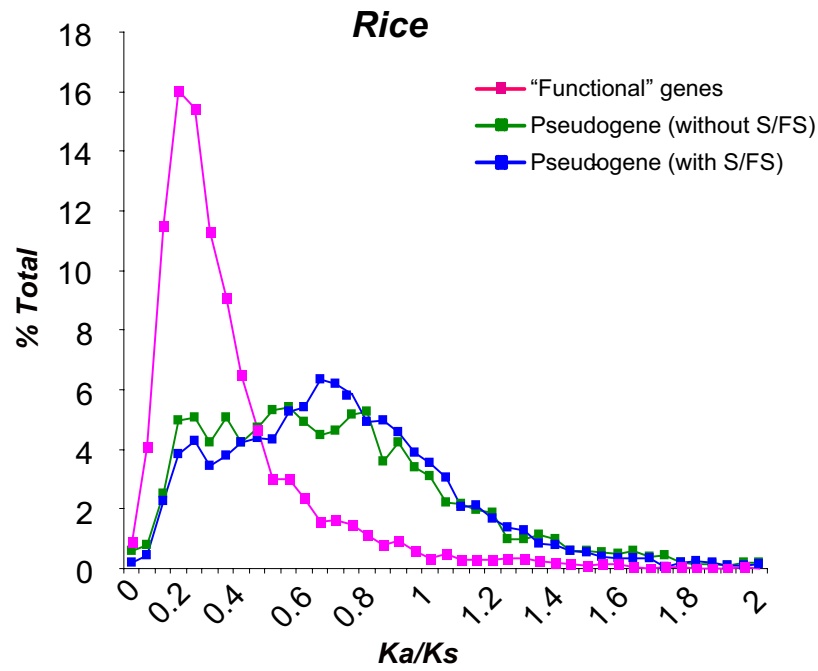

Supplement: pp.109.140632_2.pdf [file pp.109.140632_2.pdf]
